# Supplementary material
Source: Springer Nature journal article supplement (https://www.springermedizin.de/resource/supplementary/12955_2008_457_MOESM2_ESM.pdf/9560498)

SF-36 subscales

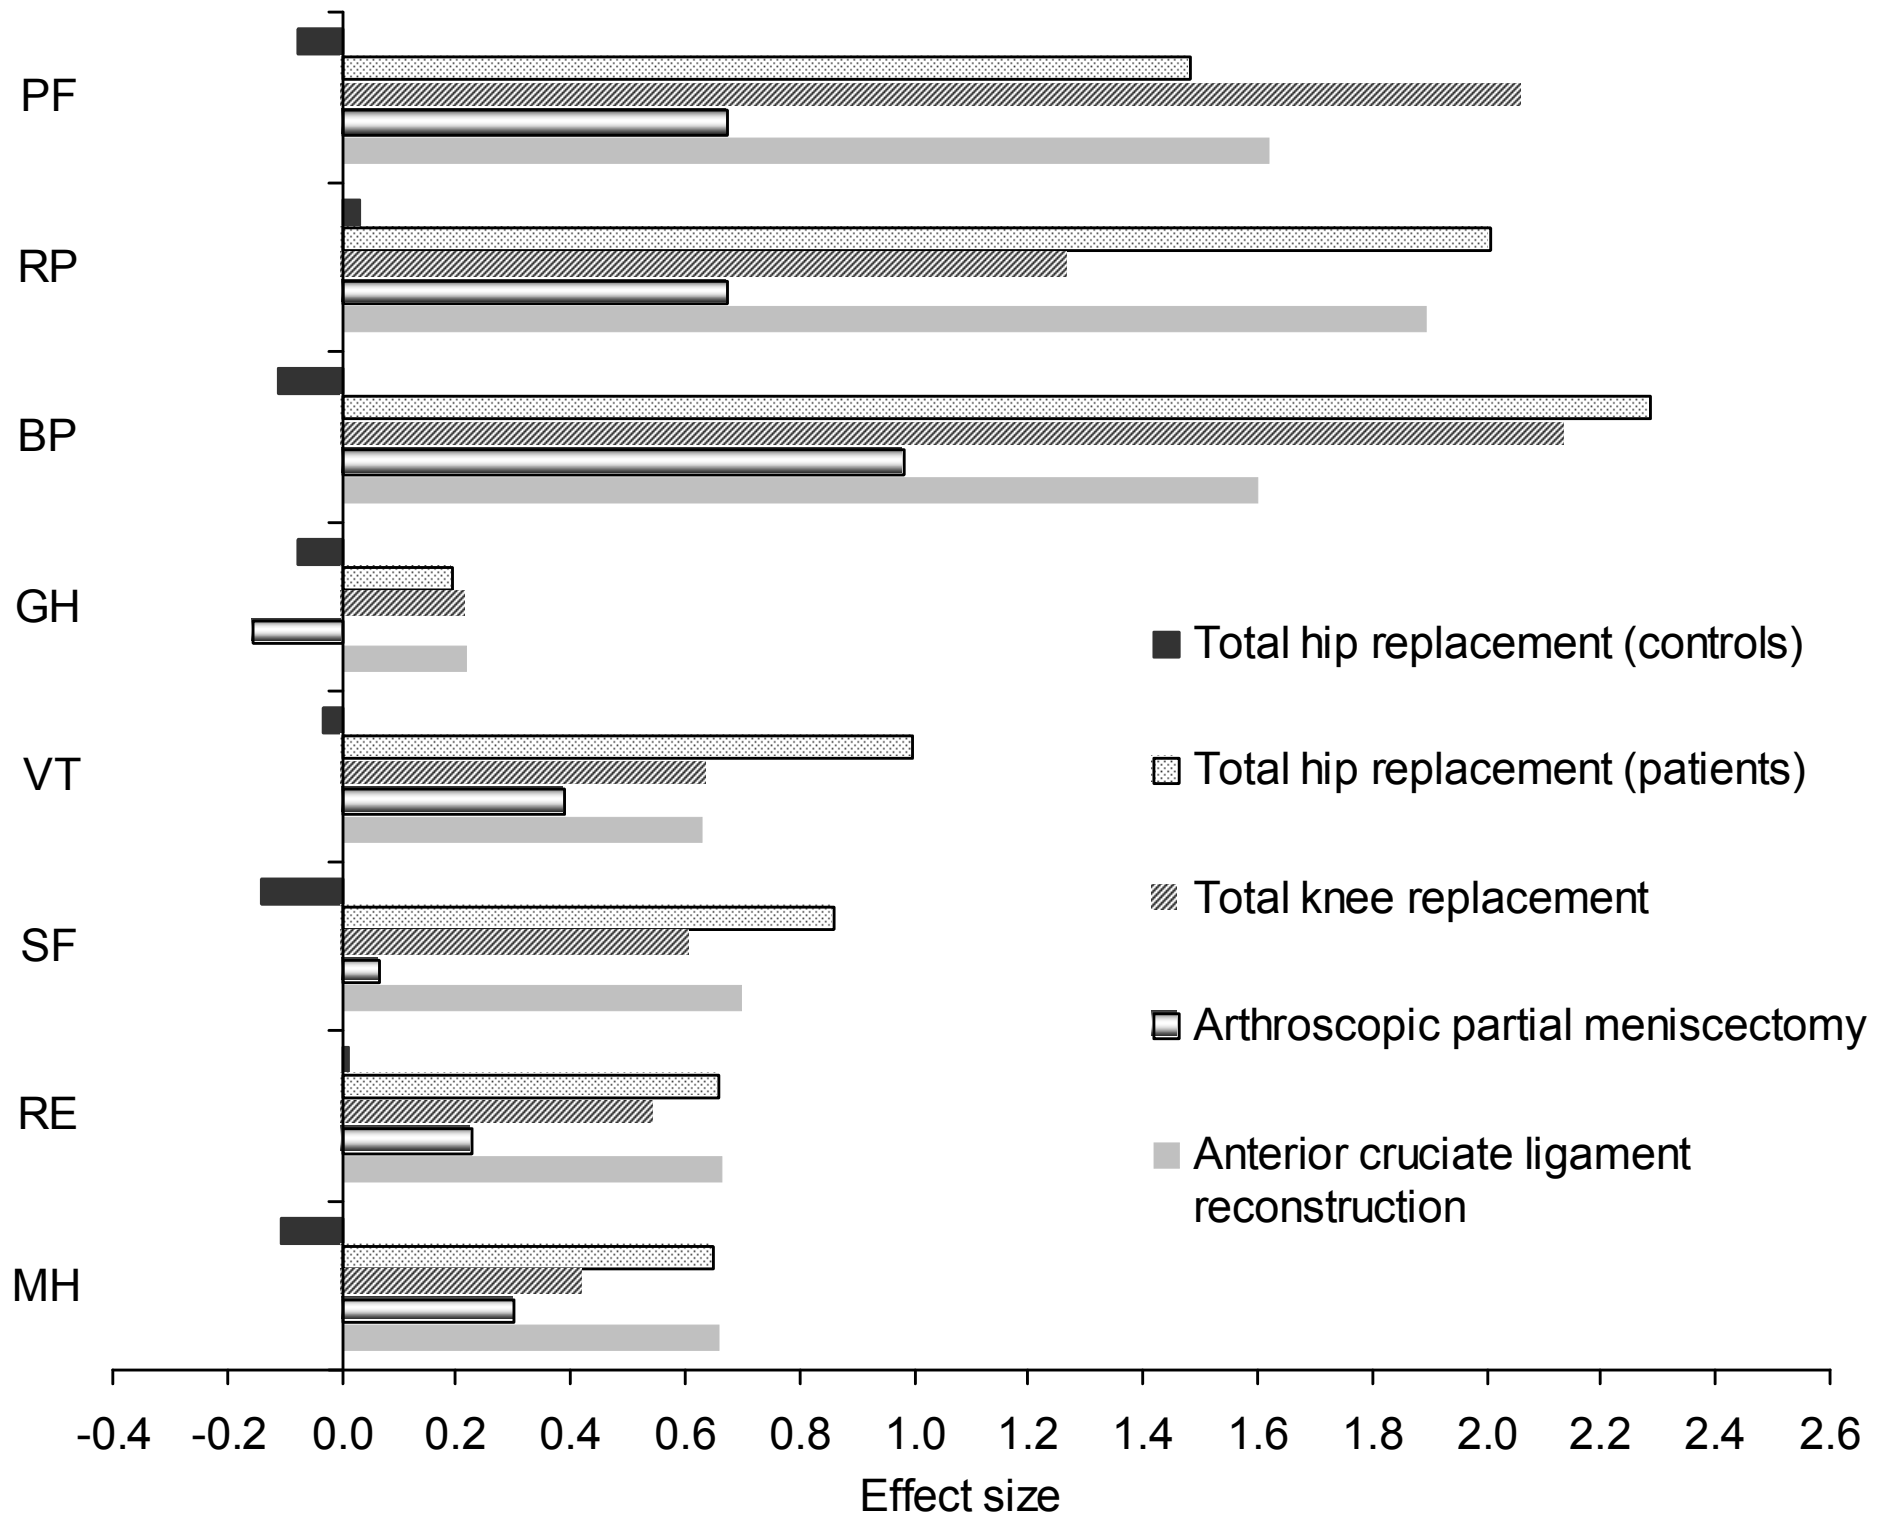

Supplement: MOESM2 [file 9560498]
